# Supplementary material for: Circulating Endothelial Progenitor Cells and Cardiovascular Outcomes
Source: Atypon-hosted journal article supplement (doi:10.1056/nejmoa043814), 2005-09-07
Supplement: nejm_werner_pdf_999sa1.pdf [file nejm_werner_pdf_999sa1.pdf]

## Supplementary Appendix

This appendix has been provided by the authors to give readers additional information about their work.

Supplement to: Werner N, Kosiol S, Schiegl T, et al. Circulating endothelial progenitor cells and cardiovascular outcomes. *N Engl J Med* 2005;353:999-1007.

Figure 1 Online-Supplement

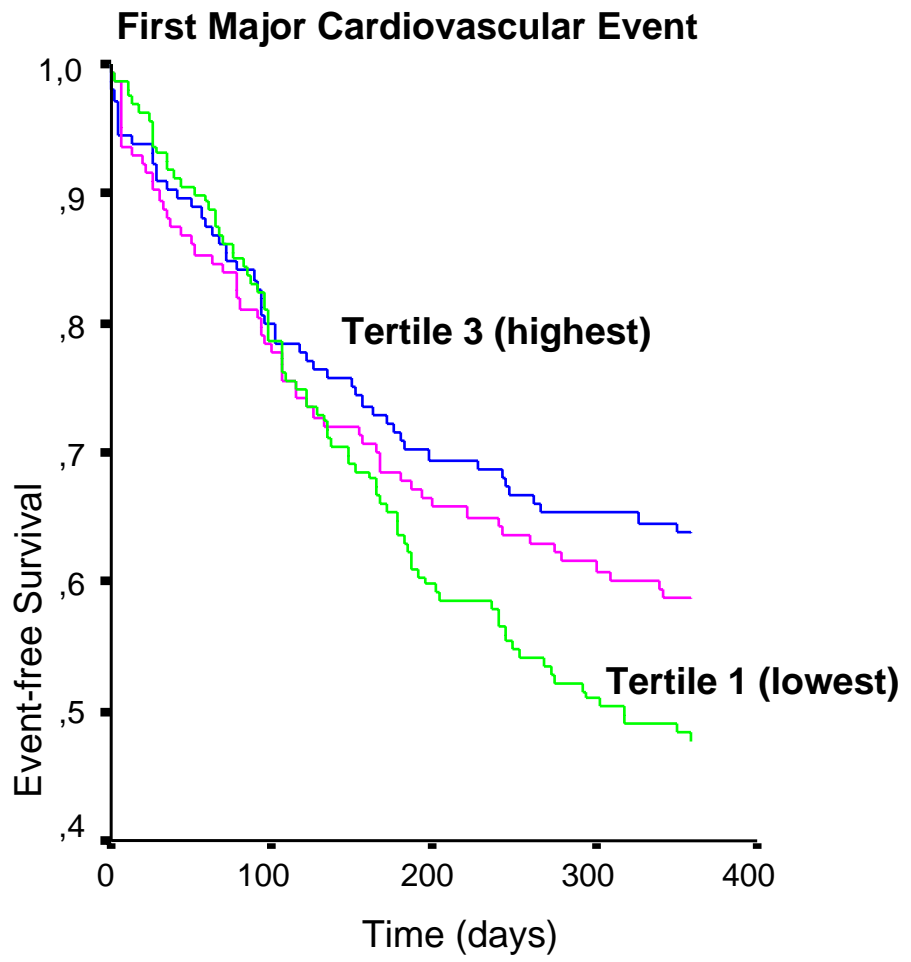

| Outcome                          | P-value (log Rank) |
|----------------------------------|--------------------|
| Cardiovascular Death             | 0.035              |
| First Major Cardiovascular Event | 0.045              |
| Revascularization                | 0.499              |
| Hospitalization                  | 0.044              |
| Death from any Cause             | 0.196              |

**CD133+ Endothelial Progenitor Cells and Outcome.**

Figure 2 Online-Supplement

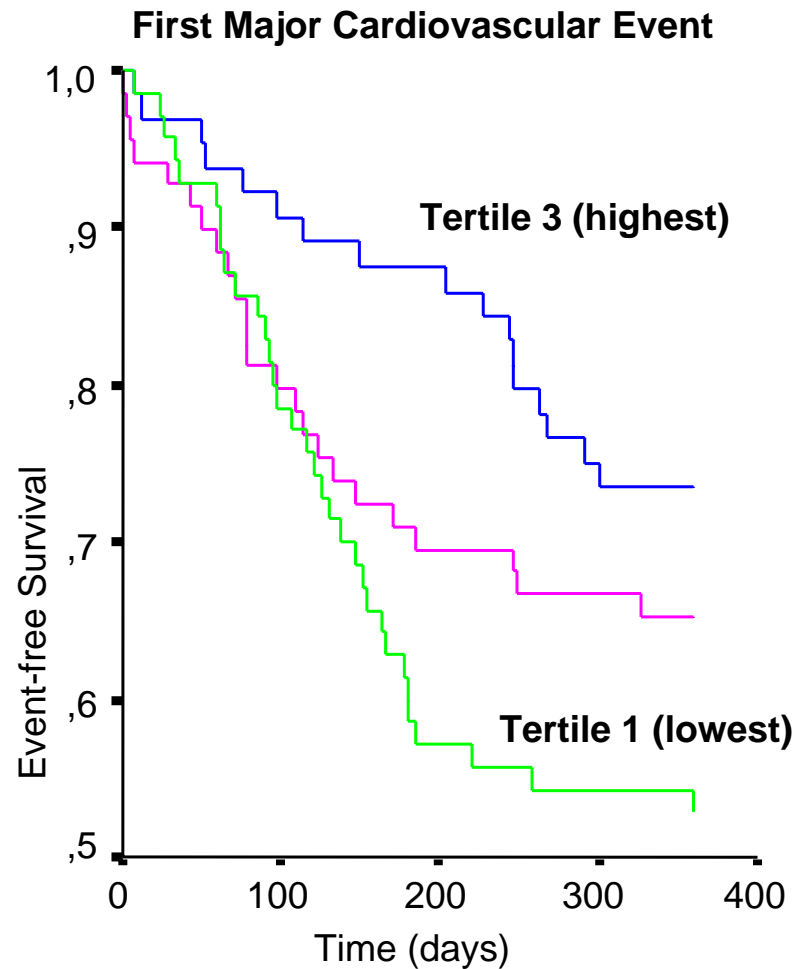

| Outcome                          | P-value (log Rank) |
|----------------------------------|--------------------|
| Cardiovascular Death             | 0.514              |
| First Major Cardiovascular Event | 0.034              |
| Revascularization                | 0.012              |
| Hospitalization                  | 0.014              |
| Death from any Cause             | 0.852              |

**Number of Colony Forming Units – Endothelial Cells and Outcome.**

## Figure Legend Online-Supplement

**Figure 1 Online-Supplement.** Kaplan-Meier curves showing the occurrence of a first major cardiovascular event (myocardial infarction, hospitalization, revascularization, and cardiovascular death) ( $p=0.045$ ) at 12 months according to levels of circulating CD133<sup>+</sup> endothelial progenitor cells at the time of enrollment. The table shows the association between CD133<sup>+</sup> endothelial progenitor cell levels and the pre-specified endpoints.

**Figure 2 Online-Supplement.** Kaplan-Meier curves showing the occurrence of a first major cardiovascular event (myocardial infarction, hospitalization, revascularization, and cardiovascular death) ( $p=0.034$ ) at 12 months according to levels of colony forming units – endothelial cells at the time of enrollment in a subgroup of 203 patients. The table shows the association between numbers of colony forming units – endothelial cells and the pre-specified endpoints.
